# Supplementary material for: Monkeypox outbreaks in the context of the COVID-19 pandemic: Network and clustering analyses of global risks and modified SEIR prediction of epidemic trends
Source: Front Public Health. 2023 Jan 24;11:1052946. doi: 10.3389/fpubh.2023.1052946 (PMC9902715; doi:10.3389/fpubh.2023.1052946)
Supplement: Supplementary file 1 [file Table_1.XLSX]

## Sheet: Sheet1
Dimension	Variable	Description	Value (median (IQR))			Data source
			2001-2021	2022
			All	Endemic	Imported
			(n=11)	(n=11)	(n=49)
Socioeconomic factors	Population density	Population density (people per sq. km of land area)	464 [27.2-235]	56.2 [27.8-109]	93.0 [31.8-220]	https://data.worldbank.org/indicator/EN.POP.DNST (accessed 30 May 2022).(44)
	Aged under 40	Proportion of 0- to 39-year olds in the general population	80.0 [57.3-81.9]	81.7 [80.1-82.5]	51.2 [46.0-63.7]	https://www.un.org (accessed 30 May 2022).(45)
	Education	Average number of years the population older than 25 participated in formal education	5.93 [4.14-11.9]	6.20 [4.50-6.55]	11.3 [9.25-12.4]	https://ourworldindata.org/global-education (accessed 20 Jun 2022)(46)
	GDP per capita	Per capita gross domestic product, a measure of a country's economic output per person	2020 [526-39200]	1540 [588-2150]	17700 [7680-43300]	https://data.worldbank.org/indicator/NY.GDP.PCAP.CD (accessed 31 May 2022)(47)
	GDP growth (%)	Annual percentage growth rate of GDP at market prices based on constant local currency	-0.212 [-0.806-1.55]	0.414 [-1.90-1.28]	-5.23 [-7.78--2.95]	https://data.worldbank.org/indicator/NY.GDP.MKTP.KD.ZG (accessed 31 May 2022).(48)
	MSM population size (thousands)	Estimated population of men who have sex with men	85.8 [3.20-195]	30.9 [3.85-70.0]	88.0 [34.0-275]	https://kpatlas.unaids.org/dashboard (accessed 7 Aug 2022).(49)
	Same sex marriage	Legal status of same sex marriage	legal 2 (18.2%)	legal 0	legal 31 (38.8%)	https://ilga.org/maps-sexual-orientation-laws (accessed 6 Jun 2022).(50)
Environment	Forest area (%)	Proportion of land under natural or planted stands of trees of at least 5 meters in situ, whether productive or not; excludes tree stands in agricultural production systems	33.8 [18.1-47.2]	35.8 [31.5-60.0]	33.6 [18.6-47.2]	https://data.worldbank.org/indicator/AG.LND.FRST.ZS (accessed 5 Jun 2022).(51)
	Temperature	Mean temperature (degrees Celsius)	26.1 [24.8-26.9]	26.4 [25.4-27.1]	14.8 [10.1-24.4]	https://climateknowledgeportal.worldbank.org/download-data (accessed 6 Jun 2022).(52)
	Precipitation	Average precipitation (mm per year)	1190 [850-1890]	1530 [1050-1870]	900 [631-1390]	https://climateknowledgeportal.worldbank.org/download-data (accessed 6 Jun 2022).(52)
Biodiversity	MPXV	Diversity distribution of species that can be infected with MPXV	3.00 [0.50-6.00]	7.00 [5.00-7.00]	1.00 [0-1.00]	https://www.iucn.org/ (accessed 3 Jun 2022)(53)
Disease burden	HIV	The number of age-standardized HIV infections	101000 [53300-329000]	104000 [72900-409000]	12600 [1830-73600]	https://vizhub.healthdata.org/gbd-results (accessed 7 Aug 2022).(54)
	COVID-19	The number of COVID-19 cases	46200 [11100-536000]	5790 [2250-11100]	839000 [277000-2820000]	https://github.com/CSSEGISandData/COVID-19 (accessed 6 Jun 2022).(55)
Health service	HAQ	Healthcare Access and Quality Index	48.5 [38.4-87.1]	32.2 [31.0-39.3]	81.9 [68.5-919]	GBD 2016 Healthcare Access and Quality Collaborators(56)
	IHR	Average of 13 International Health Regulations core capacity scores, 1st version of the questionnaire	55.7 [52.5-88.2]	49.0 [38.5-51.0]	79.0 [67.0-88.3]	https://www.who.int/data/gho/data/indicators/indicator-details/GHO/national-health-emergency-framework (accessed 31 May 2022).(57)
	Expenditure	Current health expenditure per capita in US$	69.2 [46.6-1940]	52.6 [41.7-73.3]	1360 [545-3640]	https://www.who.int/data/gho/data/indicators/indicator-details/GHO/current-health-expenditure-(che)-per-capita-in-us$ (accessed 31 May 2022)(58)
Health behaviour	Overweight (%)	Prevalence of overweight among adults, BMI ≥ 25 (age-standardized estimate)	26.7 [23.9-52.2]	30.9 [28.3-31.8]	58.4 [55.8-62.3]	https://www.who.int/data/gho/data/indicators/indicator-details/GHO/prevalence-of-overweight-among-adults-bmi-=-25-(age-standardized-estimate (accessed 7 Jul 2022).(59)
	Low physical activity	Disability-adjusted life years attributed to low physical activity	203 [165-242]	208 [179-239]	165 [131-238]	https://www.who.int/data/gho/data/indicators/indicator-details/GHO/prevalence-of-overweight-among-adults-bmi-=-25-(age-standardized-estimate) (accessed 9 Jul 2022).(60)
Mobility	Inbound travellers	The number of tourists who travel to a country other than that in which they have their usual residence, but outside their usual environment, for a period not exceeding 12 months and whose main purpose in visiting is other than an activity remunerated from within the country visited.	21900000 [14700000-58100000]	668000 [668000-668000]	2520000 [807000-7340000]	https://data.worldbank.org.cn/indicator/ST.INT.ARVL (accessed 2 Jun 2022).(61)
	Air passengers	Registered carrier departures worldwide; the domestic take offs and take offs abroad of air carriers registered in the country.	3260000 [441000-30600000]	300000 [239000-322000]	6220000 [795000-25000000]	https://data.worldbank.org.cn/indicator/IS.AIR.PSGR (accessed 3 Jun 2022).
						-62
	International flight arrivals	Worldwide flight traffic in April and May 2022. All data were filtered for routes across countries then aggregated from the airport level to the national level.		60100 [36800-132000]	968000 [391000-2490000]	https://uk.flightaware.com (accessed 2 Jul 2022)(63)
